# Supplementary material for: Susceptibility of Beavers to Chronic Wasting Disease
Source: MDPI journal article supplement (doi:10.3390/biology11050667), 2022-04-26
Supplement: s1 [file s1]

Supplemental Materials

Table S1. PCR primers

| Primer Set | Forward                                                                                                      | Reverse                                                |
|------------|--------------------------------------------------------------------------------------------------------------|--------------------------------------------------------|
| one        | 5'- ATC TGT CAT GGC GAA CCT TG -3'                                                                           | 5'- GGG ACA AAG AGA GAA GCA AGA A - 3'                 |
| two        | 5'- ATC TCG AGA GTC CAA TTT AGG AGA GCC<br>AAG CAG ACT ATA AGT CAT CAT GGC GAA<br>CCT TGG CTG CTG GCT GC -3' | 5'- TGA CGC GTT CAT CCC ACT ATC AGG<br>AAG ATG AGG -3' |

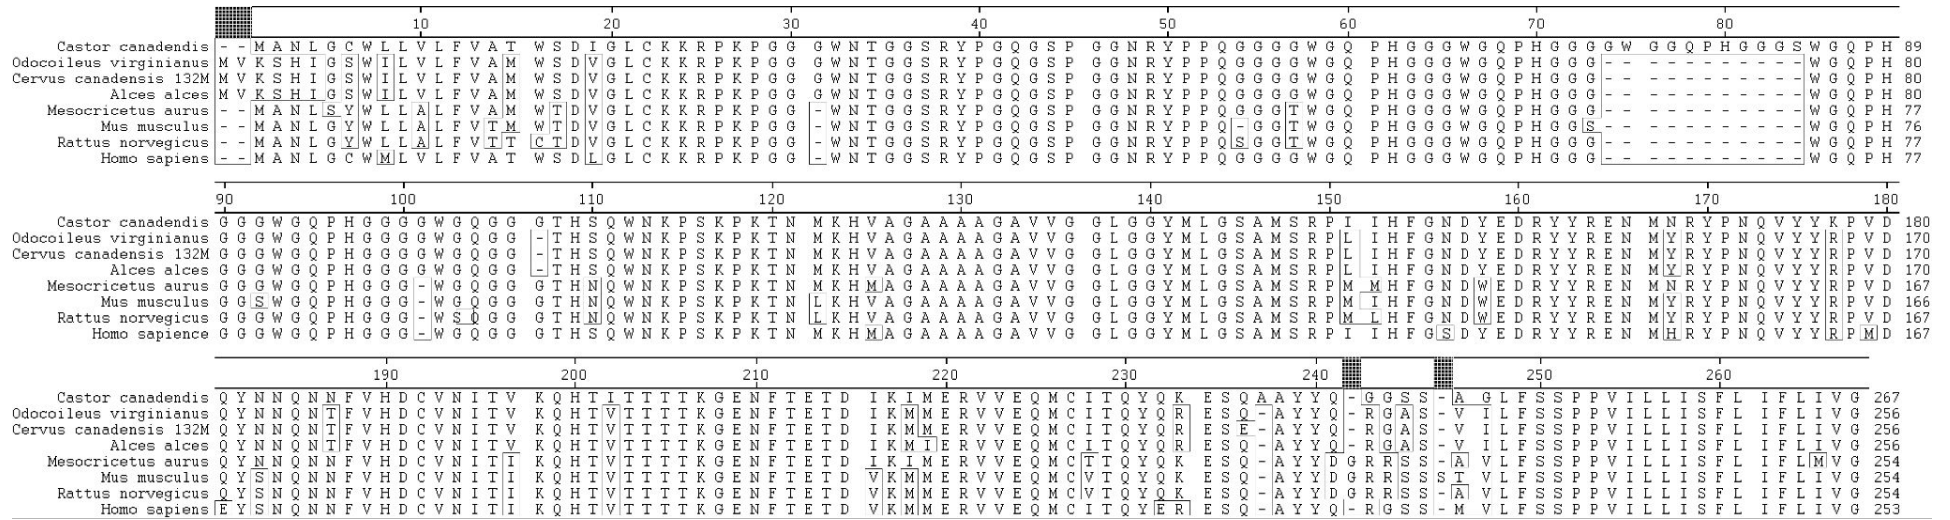

Figure S1. Sequence alignment of prion proteins.

| Percent Identity |   |      |      |      |      |      |      |      |      |   |                        |
|------------------|---|------|------|------|------|------|------|------|------|---|------------------------|
|                  | 1 | 2    | 3    | 4    | 5    | 6    | 7    | 8    |      |   |                        |
| Divergence       | 1 |      | 91.4 | 91.0 | 91.0 | 90.6 | 89.4 | 88.6 | 92.5 | 1 | Castor canadensis      |
|                  | 2 | 7.9  |      | 99.6 | 99.6 | 87.4 | 86.6 | 86.6 | 89.7 | 2 | Odocoileus virginianus |
|                  | 3 | 8.3  | 0.4  |      | 99.2 | 87.0 | 86.2 | 86.2 | 89.3 | 3 | Cervus canadensis 132M |
|                  | 4 | 8.3  | 0.4  | 0.8  |      | 87.0 | 86.2 | 86.2 | 89.3 | 4 | Alces alces            |
|                  | 5 | 8.8  | 11.6 | 12.1 | 12.1 |      | 94.1 | 94.1 | 89.7 | 5 | Mesocricetus aurus     |
|                  | 6 | 11.1 | 11.6 | 12.1 | 12.1 | 5.8  |      | 96.5 | 89.7 | 6 | Mus musculus           |
|                  | 7 | 11.1 | 13.0 | 13.5 | 13.5 | 6.2  | 2.8  |      | 89.7 | 7 | Rattus norvegicus      |
|                  | 8 | 7.5  | 9.3  | 9.8  | 9.8  | 11.1 | 10.7 | 11.1 |      | 8 | Homo sapiens           |
|                  | 1 | 2    | 3    | 4    | 5    | 6    | 7    | 8    |      |   |                        |

**Figure S2.** Homology of prion protein primary structure between beavers, cervids, other rodents, and humans.

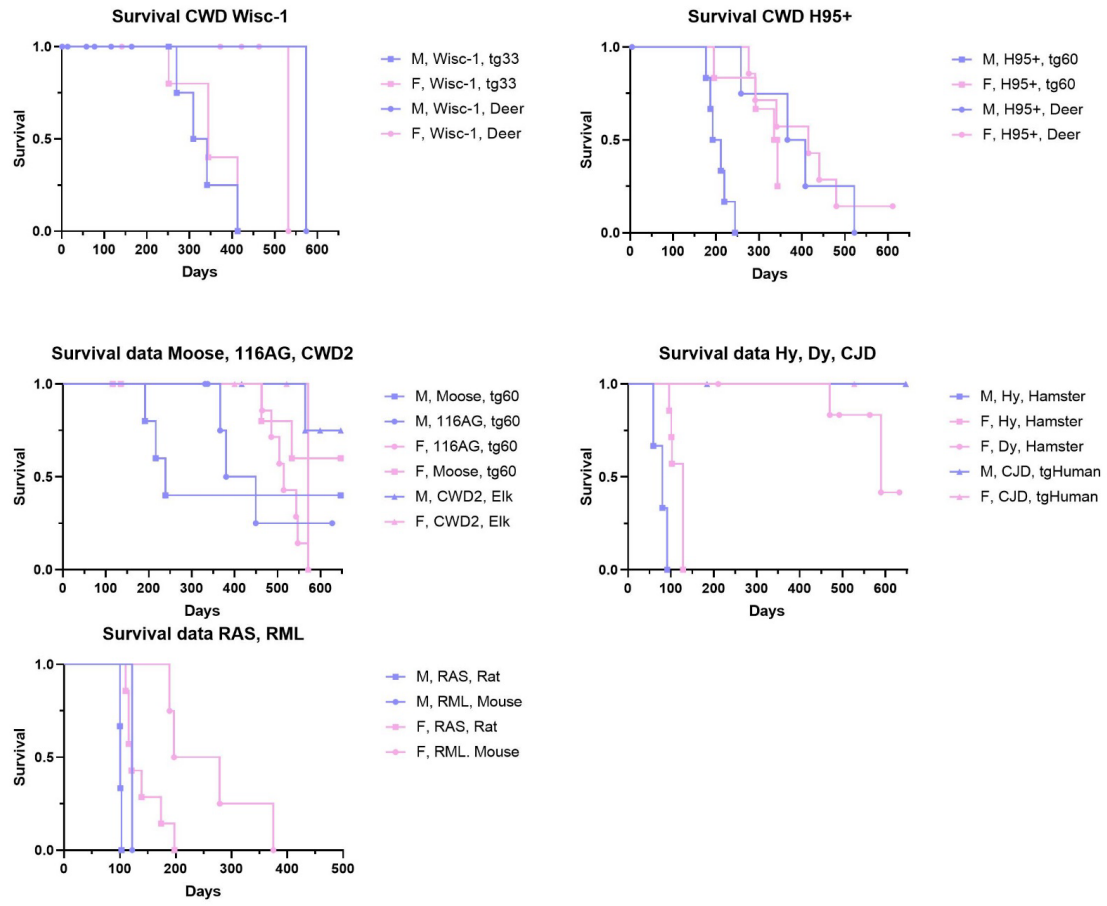

**Figure S3.** Survival curves of tgBeaver mice challenged with indicated prion strains.

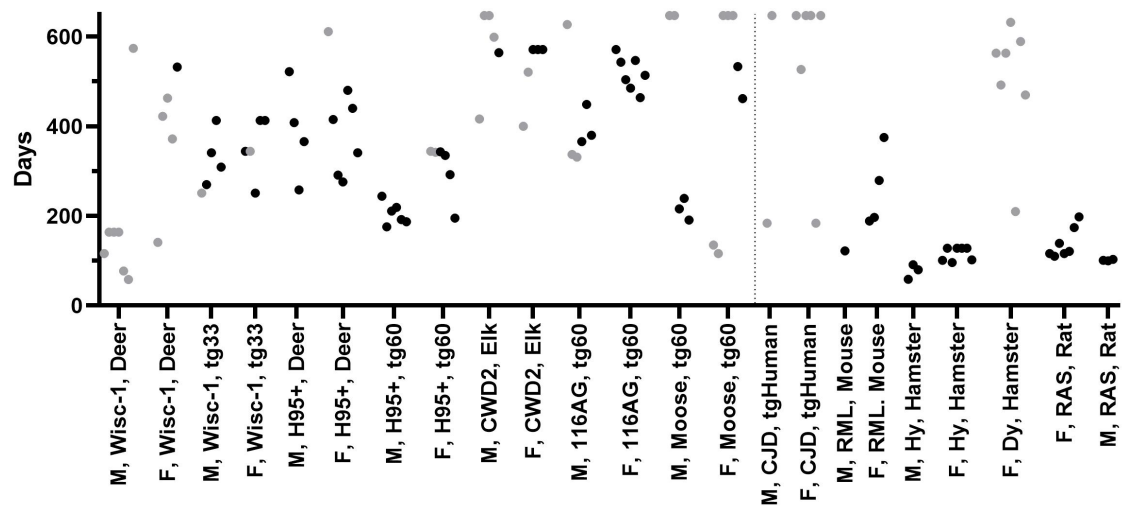

**Figure S4.** Dot plots of incubation periods in tgBeaver mice. The sex and strain used for the challenge is indicated on the x-axis. Black dots indicate mice with protease resistant PrP in the brain as indicated by western blot and/or immunohistochemical detection. Grey dots are mice that did not develop prion disease.

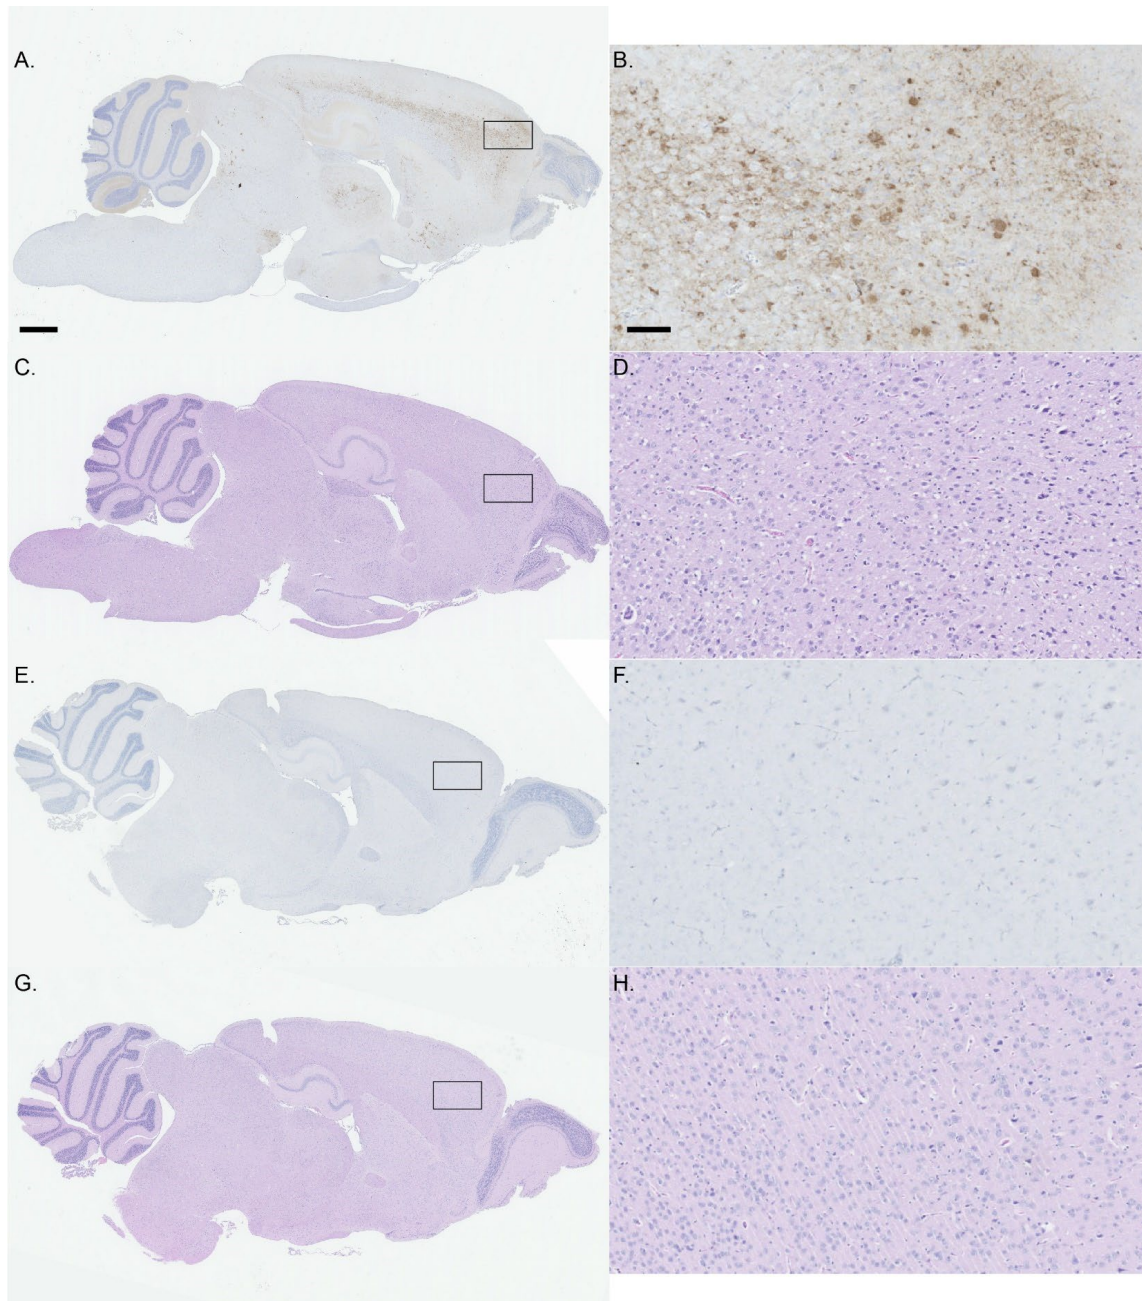

**Figure S5.** Specificity of immunohistochemical staining in tgBeaver mice. A-D. Neuropathology from a sick tgBeaver mouse inoculated with H95+ prions. E-H. Neuropathology from a healthy, unaffected tgBeaver mouse inoculated with tg60 moose prions collected at the end of the study (647 days). Panels A. B. E. and F. were immunostained for PrP using mAb Bar224 1:1,000. C. D. G. and H. were stained with hematoxylin and eosin. A. C. E. and F., the scale bar is 1 mm. B. D. F. and G., the scale bar is 100  $\mu$ m. Panels B. D. F. and H. are magnified images from the panels to their left, (A. C. E. and G.) respectively.
